# Supplementary material for: Factors Influencing Italian Consumers’ Willingness to Pay for Eggs Enriched with Omega-3-Fatty Acids
Source: Foods. 2022 Feb 14;11(4):545. doi: 10.3390/foods11040545 (PMC8870929; doi:10.3390/foods11040545)
Supplement: Supplementary file 1 [file foods-11-00545-s001.zip › foods-1581213-supplementary.pdf]

## Supplementary Materials

# Factors Influencing Italian Consumers' Willingness to Pay for Eggs Enriched with Omega-3-Fatty Acids

### The questionnaire

**Table S1.** Variables used in the questionnaire.

| Item Groups                                                                                                                  | Items                                                                                                                                          | Issues                                                                                                                                                                                                                                                                                                                                                                                                                                                                                                                                                                          |
|------------------------------------------------------------------------------------------------------------------------------|------------------------------------------------------------------------------------------------------------------------------------------------|---------------------------------------------------------------------------------------------------------------------------------------------------------------------------------------------------------------------------------------------------------------------------------------------------------------------------------------------------------------------------------------------------------------------------------------------------------------------------------------------------------------------------------------------------------------------------------|
| <b>Section 1: consumers habits, their preferences and their attitudes towards food choice (mean score on 10-point scale)</b> |                                                                                                                                                |                                                                                                                                                                                                                                                                                                                                                                                                                                                                                                                                                                                 |
| 1                                                                                                                            |                                                                                                                                                | You are: omnivore (ab) (0); vegetarian (1); vegan (2)                                                                                                                                                                                                                                                                                                                                                                                                                                                                                                                           |
| 2                                                                                                                            |                                                                                                                                                | Responsibility for the grocery shopping in family (buyer) (0 = no, 1 = yes)                                                                                                                                                                                                                                                                                                                                                                                                                                                                                                     |
| 3                                                                                                                            | Frequency of some food consumption (0 = never; 1 = once a month; 2 = once a week; 3 = twice a week; 4 = more than twice a week; 5 = every day) | Red meat (red_meat)<br>White meat (white_meat)<br>Dairy products (dairy)<br>Eggs (eggs)<br>Legumes (legumes)<br>Fish (fish)<br>Dry fruit (fruit)<br>Vegetables (vegetables)<br>Fresh fruit (fresh_fruit)<br>Cereals (cereals)                                                                                                                                                                                                                                                                                                                                                   |
| 4                                                                                                                            |                                                                                                                                                | Do you do gym? (fisc) (0 = No; 1 = Yes)                                                                                                                                                                                                                                                                                                                                                                                                                                                                                                                                         |
| 5                                                                                                                            |                                                                                                                                                | Do you suffer from cardiovascular disease? (cardio) (0 = No; 1 = Yes)                                                                                                                                                                                                                                                                                                                                                                                                                                                                                                           |
| 6                                                                                                                            |                                                                                                                                                | Do you suffer from hypercholesterolemia? (ipercol) (0 = No; 1 = Yes)                                                                                                                                                                                                                                                                                                                                                                                                                                                                                                            |
| 7                                                                                                                            |                                                                                                                                                | Do you suffer from blood pressure? (press) (0 = No; 1 = Yes)                                                                                                                                                                                                                                                                                                                                                                                                                                                                                                                    |
| 8                                                                                                                            | Aspects you pay attention when you consume food (Health aspects)                                                                               | The hygienic requirements of food (hygienic)<br>The effects on human health (health_effects)<br>The caloric intake of food (caloric)<br>The food protein intake (proteic)<br>The food fat intake (fat)<br>The environmental impact of food consumption (environmental_impact)<br>The geographic origin of food (geographic)<br>The food and culinary traditions (traditions)<br>The production method of food (production_method)                                                                                                                                               |
| 9                                                                                                                            | How the environmental issues influence your food choices? (Env_aspects)                                                                        | I inform on low impact products (low_impact)<br>I inform on provenience of products (or)<br>I know brands with low environmental impacts production (brand_low_impacts)<br>I always buy organic products (buy_organic)<br>I always read label products with attention (label)<br>I try to buy products on local market (local_products)<br>I try to buy seasonal products (season_prod)<br>My food choices are not influenced by the environmental issues (no_influence)<br>I avoid brands of foreign products (foreign_prod)<br>I try to reduce meat consumption (reduce_meat) |
| 10                                                                                                                           |                                                                                                                                                | Where do you buy eggs? (where) (1 = by a breeder; 2 = in a supermarket; 3 = I'm a breeder; 4 = other)                                                                                                                                                                                                                                                                                                                                                                                                                                                                           |
| 11                                                                                                                           | Attributes you pay attention when you choose table eggs (Attributes of eggs)                                                                   | Eggs size (eggs_size)<br>Color shell (color_shell)<br>Rearing type (i.e. free-range eggs, barn and caged eggs) (rearing_type)<br>Color yolk (color_yolk)<br>Feed given to chickens (animal_feed)<br>Brand (brand_prod)<br>Provenience of eggs (i.e. local, national or international provenience of eggs) (provenience)                                                                                                                                                                                                                                                         |
| 12                                                                                                                           | Agreement or disagreement with the following statements (Food neophobia)                                                                       | I am constantly sampling new and different foods (new_food*)<br>I don't trust new food (dont_trust)<br>If I don't know what is in a food, I won't try it" (no_try)<br>I like foods from different cultures (different_culture*)<br>Ethnic food looks too weird to eat (strange)<br>At dinner parties, I will try a new food (dinner_try*)<br>I am afraid to eat things I have never had before (fear)<br>I am very particular about the foods I will eat (attention)<br>I like to try new ethnic restaurants (restaurant*)                                                      |
| 13                                                                                                                           | Agreement or disagreement with                                                                                                                 | New food technologies are unnecessary (no_new_tec)<br>The environmental benefits of new food technologies are often overstated (env_tec)                                                                                                                                                                                                                                                                                                                                                                                                                                        |

|    |                                                                                                |                                                                                                                                                                                          |
|----|------------------------------------------------------------------------------------------------|------------------------------------------------------------------------------------------------------------------------------------------------------------------------------------------|
|    | the following statements<br>(Food technology neophobia)                                        | The benefits of new food technologies to reduce world hunger are often overstated (hunger_tec)                                                                                           |
|    |                                                                                                | New food technologies decrease the natural quality of food (low_quality)                                                                                                                 |
|    |                                                                                                | There is no sense in trying out high-tech food products because the ones I eat are already good enough” (good)                                                                           |
|    |                                                                                                | I don't have enough knowledge on effects of new food technologies on human health (effect_health)                                                                                        |
|    |                                                                                                | Section 2: consumer perceptions and their attitudes towards functional eggs                                                                                                              |
| 14 |                                                                                                | Have you ever heard about functional food? (func_food) (0 = No; 1 = Yes)                                                                                                                 |
| 15 |                                                                                                | Have you ever heard about functional eggs enriched with omega 3? (egg_omega) (0 = No; 1 = Yes)                                                                                           |
| 16 |                                                                                                | Do you know production method of eggs enriched with omega 3? (method_egg) (0 = No; 1 = Yes)                                                                                              |
| 17 |                                                                                                | Have you ever eaten functional eggs enriched with omega 3 before? (pass) (0 = No; 1 = Yes)                                                                                               |
| 18 |                                                                                                | Would you be willing to eat functional eggs enriched with omega 3? (will) (0 = No; 1 = Yes)                                                                                              |
| 19 |                                                                                                | How much would you be willing to pay for functional egg enriched with omega 3 compared with that one conventional egg (whom price is of 0.32 euro)? (wtp) (0 = none, 1 = <50%, 2 = >50%) |
| 20 | What functional egg characteristics could affect your decision to eat it?<br>(Functional eggs) | If I think to eat functional egg enriched with omega 3, I'm curious to try it (curiosity)                                                                                                |
|    |                                                                                                | If functional egg enriched with omega 3 produces health benefits, I would eat it (low_col)                                                                                               |
|    |                                                                                                | If my friends eat functional egg enriched with omega 3, I would eat it (friends)                                                                                                         |
|    |                                                                                                | If functional eggs enriched with omega 3 are more nutrient than conventional eggs, I would eat it (more_nutrient)                                                                        |
|    |                                                                                                | If functional egg enriched with omega 3 is less expensive than conventional egg, I would eat it (low_cost)                                                                               |
|    |                                                                                                | If functional egg is produced by my trusted farmer, I would eat it (farmer)                                                                                                              |
|    |                                                                                                | If I get more information about functional eggs enriched with omega 3, I would eat it (more_info)                                                                                        |
|    |                                                                                                | Section 3: sociodemographic information                                                                                                                                                  |
| 21 |                                                                                                | Age (age)                                                                                                                                                                                |
| 22 |                                                                                                | Gender (gender) (0 = female; 1 = male)                                                                                                                                                   |
| 23 |                                                                                                | Education (edu) : 0 = primary or secondary (low education); 1 = degree, master and/or PhD (high education)                                                                               |
| 24 |                                                                                                | Marital status (marital status) (0 = unmarried; 1 = married; 2 = separated/divorced)                                                                                                     |
| 25 |                                                                                                | Annual Income (income) (0 = <10,000; 1 = 10,001–20,000; 2 = 20,001–30,000; 3 = 30,001–40,000; 4 = 40,001–50,000; 5 = >50,001)                                                            |

\*Reversed coded.

Word in brackets refers to the abbreviation of the variable in the manuscript.
